# Supplementary material
Source: PubMed Central journal article supplement (PMC3104106)
Supplement: NIHMS288125-supplement-1.pdf [file NIHMS288125-supplement-1.pdf]

# Online Only Supplemental Material

**Suppl table 1 Comparison of DEFUSE and EPITHET study characteristics**

| Trial Profile               | DEFUSE                                                                                                                                                                                                                                                                                                                                                                                                                                                                                            | EPITHET                                                                                                                                                                                                                                                                                                                                                                                                                                |
|-----------------------------|---------------------------------------------------------------------------------------------------------------------------------------------------------------------------------------------------------------------------------------------------------------------------------------------------------------------------------------------------------------------------------------------------------------------------------------------------------------------------------------------------|----------------------------------------------------------------------------------------------------------------------------------------------------------------------------------------------------------------------------------------------------------------------------------------------------------------------------------------------------------------------------------------------------------------------------------------|
| Funding                     | National Institutes of Health (NINDS), RO1 NS39325, Genentech                                                                                                                                                                                                                                                                                                                                                                                                                                     | National Health and Medical Research Council, Australia; National Stroke Foundation, Australia; Heart Foundation of Australia                                                                                                                                                                                                                                                                                                          |
| Number of sites             | 6                                                                                                                                                                                                                                                                                                                                                                                                                                                                                                 | 15                                                                                                                                                                                                                                                                                                                                                                                                                                     |
| Location                    | United States, Canada, Belgium                                                                                                                                                                                                                                                                                                                                                                                                                                                                    | Australia, New Zealand, Belgium, UK                                                                                                                                                                                                                                                                                                                                                                                                    |
| Years of enrollment         | April 2001 – April 2005                                                                                                                                                                                                                                                                                                                                                                                                                                                                           | April 2001 – January 2007                                                                                                                                                                                                                                                                                                                                                                                                              |
| Number of patients screened | 1020                                                                                                                                                                                                                                                                                                                                                                                                                                                                                              | 3908                                                                                                                                                                                                                                                                                                                                                                                                                                   |
| <b>Study Design</b>         |                                                                                                                                                                                                                                                                                                                                                                                                                                                                                                   |                                                                                                                                                                                                                                                                                                                                                                                                                                        |
| Treatment allocation        | Open-label single arm study of IV tPA                                                                                                                                                                                                                                                                                                                                                                                                                                                             | Double blind RCT of IV tPA                                                                                                                                                                                                                                                                                                                                                                                                             |
| Treatment window            | 3 to 6 hours after symptom onset                                                                                                                                                                                                                                                                                                                                                                                                                                                                  | 3 to 6 hours after symptom onset                                                                                                                                                                                                                                                                                                                                                                                                       |
| Primary outcome measure     | <i>Favorable clinical response</i> defined as an improvement of 8 points or more on the NIHSS between baseline and 30 days or a score of 0-1 at day 30.                                                                                                                                                                                                                                                                                                                                           | <i>Infarct growth</i> defined as the ratio of 90-day infarct volume over baseline DWI lesion volume                                                                                                                                                                                                                                                                                                                                    |
| Primary analysis            | The odds ratio of favorable clinical response associated with reperfusion in mismatch patients                                                                                                                                                                                                                                                                                                                                                                                                    | The difference in mean infarct growth between tPA and placebo in mismatch patients                                                                                                                                                                                                                                                                                                                                                     |
| Inclusion criteria          | <ol style="list-style-type: none"> <li>1) 18 years or older</li> <li>2) clinical diagnosis of ischemic stroke</li> <li>3) NIHSS &gt; 5</li> <li>4) tPA start in 3 to 6 hour window</li> </ol>                                                                                                                                                                                                                                                                                                     | <ol style="list-style-type: none"> <li>1) 18 years or older</li> <li>2) acute hemispheric ischaemic stroke</li> <li>3) NIHSS &gt; 4</li> <li>4) treatment in 3-6 hour time-window</li> </ol>                                                                                                                                                                                                                                           |
| Exclusion criteria          | <ol style="list-style-type: none"> <li>1) comatose or severely obtunded</li> <li>2) rapidly improving symptoms</li> <li>3) a history of stroke within the last 6 weeks</li> <li>4) premorbid mRS score of 3 or higher</li> <li>5) seizure at symptom onset</li> <li>6) previous intracranial hemorrhage</li> <li>7) evidence of acute hemorrhage</li> <li>8) clearly identifiable hypodensity involving more than one third of the MCA territory on the baseline non-contrast brain CT</li> </ol> | <ol style="list-style-type: none"> <li>1) premorbid mRS score of 3 or higher</li> <li>2) acute hemorrhage on non-contrast CT</li> <li>3) major early ischemic change (defined as ischaemia of more than one third of the MCA territory)</li> <li>4) inability to undergo MRI</li> <li>5) standard contraindications to alteplase</li> <li>6) confounding neurological diseases such as dementia or life-threatening illness</li> </ol> |
| Imaging Protocol            |                                                                                                                                                                                                                                                                                                                                                                                                                                                                                                   |                                                                                                                                                                                                                                                                                                                                                                                                                                        |
| Baseline MRI                | Before treatment: DWI, PWI, MRA, GRE                                                                                                                                                                                                                                                                                                                                                                                                                                                              | Before treatment: DWI, PWI, MRA, GRE                                                                                                                                                                                                                                                                                                                                                                                                   |
| Early f/u MRI               | 3 to 6 hours after tPA: DWI, PWI, MRA-COW, GRE                                                                                                                                                                                                                                                                                                                                                                                                                                                    | 3 to 5 days after treatment: DWI, PWI, MRA-COW, GRE                                                                                                                                                                                                                                                                                                                                                                                    |
| Final MRI                   | Day 30: FLAIR                                                                                                                                                                                                                                                                                                                                                                                                                                                                                     | Day 90: T2                                                                                                                                                                                                                                                                                                                                                                                                                             |
| PWI lesion segmentation     | Tmax>2sec threshold                                                                                                                                                                                                                                                                                                                                                                                                                                                                               | Tmax≥2sec threshold                                                                                                                                                                                                                                                                                                                                                                                                                    |
| DWI lesion segmentation     | Semi-automated outline based on b1000 signal intensity that is >3 SDs higher than in contralateral control region                                                                                                                                                                                                                                                                                                                                                                                 | Manual outline of lesion on b1000 map                                                                                                                                                                                                                                                                                                                                                                                                  |

**Suppl Table 2****Comparison of MRI profiles between assessments with RAPID and with software used in the original study analyses**

|                                                          |                 | MR profile assessment according to RAPID |           |             |       |
|----------------------------------------------------------|-----------------|------------------------------------------|-----------|-------------|-------|
|                                                          |                 | Target Mismatch                          | Malignant | No Mismatch | Small |
| MR profile assessment according to original study method | Target Mismatch | 65                                       | 1         | 11          | 6     |
|                                                          | Malignant       | 12                                       | 28        | 0           | 0     |
|                                                          | No Mismatch     | 5                                        | 0         | 7           | 3     |
|                                                          | Small           | 0                                        | 0         | 2           | 19    |

The interrater agreement between the original study method and RAPID was good ( $\kappa=0.61$ ). Reclassification in terms of MR profile between original and RAPID-derived assessment occurred in 40 patients. It was generally the result of smaller RAPID derived PWI lesion volumes compared to original PWI lesion volumes.

## Supplemental textbox 1. Processing steps for DWI lesion segmentation in RAPID

Step 1. DWI segmentation based on an absolute threshold: An absolute threshold of  $ADC < 615 \times 10^{-6} \text{ mm}^2/\text{s}$  was applied, followed by a morphologic opening operation with structural element size of 2 mm to remove spike noise in the mask obtained by thresholding.

Step 2. DWI segmentation based on relative thresholds: Mean (M) and standard deviation (SD) of the signal intensity in normal brain tissue was obtained for  $b=1000$  (a.k.a. isotropic diffusion) and exponential-attenuation (EA) images; normal tissue was defined as tissue with ADC values between 750 and  $1900 \times 10^{-6} \text{ mm}^2/\text{s}$ . This yielded values of  $M_{b1000}$ ,  $SD_{b1000}$  and  $M_{EA}$ ,  $SD_{EA}$ . Relative thresholds (t) were constructed:  $t_{b1000} = (M_{b1000} + k * SD_{b1000})$ , and  $t_{EA} = (M_{EA} + k * SD_{EA})$ . The value of k was empirically determined to be 2.7. These thresholds were then applied to b1000 and EA maps to outline the lesion. Stroke core outlined using relative threshold was detected in voxels where both b1000 and EA values were above the respective thresholds simultaneously.

Step 3. The final DWI lesion was obtained as a union of the relative and absolute thresholding (i.e. at least one of the ADC-based or b1000/EA-based methods delivered positive identification).

## Supplemental textbox 2. Processing steps for PWI lesion segmentation in RAPID

Step 1. Patient motion in the raw PWI dynamic scans was corrected in-slice using 2D spatial coregistration of individual timepoints to a mean image obtained by averaging of all timepoints.

Step 2. Measured MRI signals were converted to values of relative shortening of the transverse relaxivity.

Step 3. Arterial input function (AIF) was selected automatically by the software in location where signals with high amplitude, early arrival time, and below-average width were spatially clustered; the program ensured that only anatomically meaningful locations were considered. A typical result of the selection was AIF in the middle cerebral, internal carotid, or anterior cerebral arteries.

Step 4. After vascular signals were identified, a correction for nonlinear effect of gadolinium tracers in tissue and in bulk blood was applied.<sup>10</sup>

Step 5. Quantitative perfusion parameters (CBV, CBF, MTT, Tmax) were obtained by deconvolving tissue signals with the AIF. The deconvolution was applied in the frequency domain (equivalent to circular deconvolution), with a regularization filter that removed components with amplitude below 15% of the maximum component.

Step 6. The Tmax parameter was identified as the time of global maximum of the deconvolved tissue residue function.

Supplemental figure

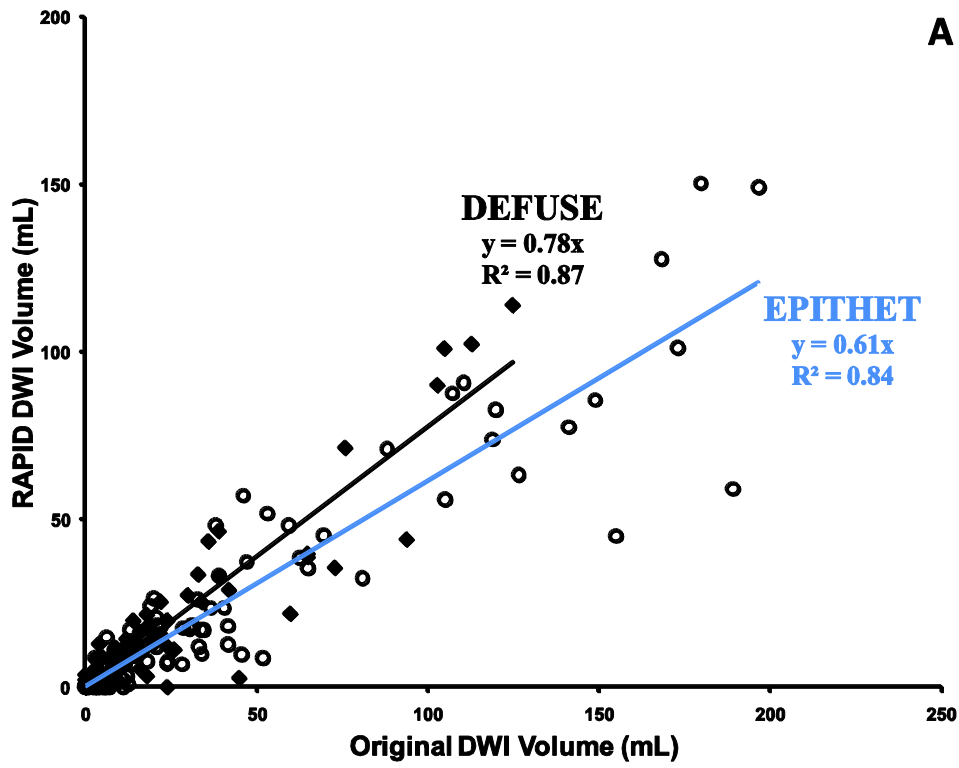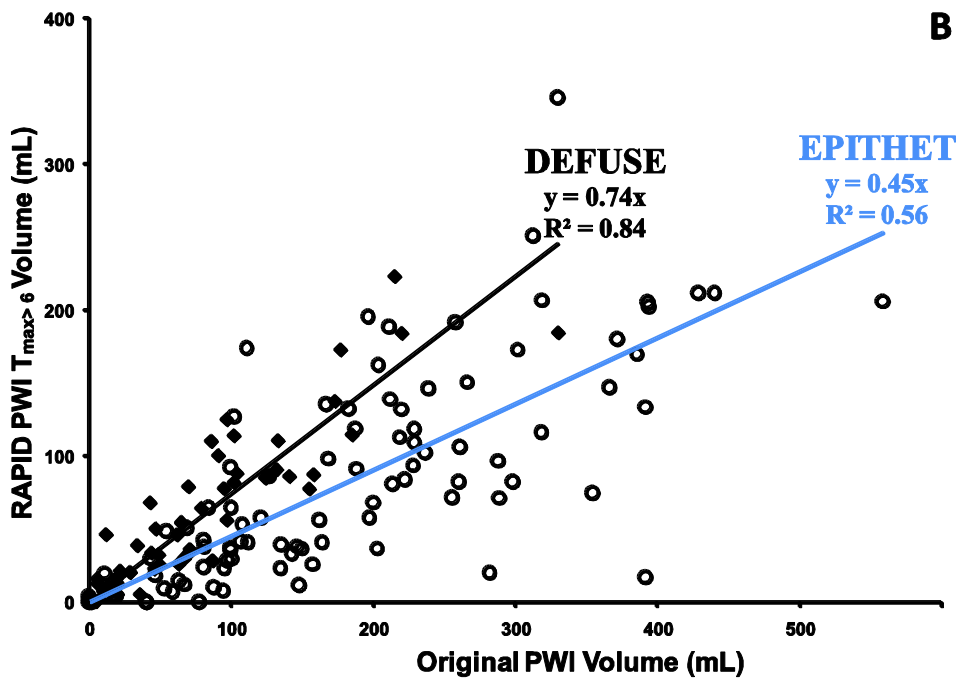

## Figure Legend

Figure A shows the correlation between DWI lesion volumes, determined as part of the primary data analyses of the DEFUSE and EPITHET studies, and DWI lesion volumes determined using RAPID, an automated image processing system. Figure B shows the same correlation for PWI volumes. Data for DEFUSE are indicated by solid diamonds ( $\blacklozenge$ ); EPITHET data by open circles (o). The difference between original and RAPID-derived lesion volumes was significantly smaller for DEFUSE data compared with EPITHET data for both DWI (Fig A,  $p=0.001$  for difference between regression coefficients) and PWI (Fig B,  $p=0.006$  for difference between regression coefficients).
